# Supplementary material for: Substrate viscoelasticity affects human macrophage morphology and phagocytosis
Source: Royal Society of Chemistry journal article supplement (doi:10.1039/d2sm01683d), 2023-01-01
Supplement: d2sm01683d1.pdf [file d2sm01683d1.pdf]

# Substrate viscoelasticity affects human macrophage morphology and phagocytosis

Nikita Kalashnikov<sup>1</sup> and Christopher Moraes<sup>1,2,3,4,\*</sup>

<sup>1</sup> Department of Chemical Engineering, McGill University, Montreal, Canada

<sup>2</sup> Department of Biological and Biomedical Engineering, McGill University, Montreal, Canada

<sup>3</sup> Goodman Cancer Research Center, McGill University, Montreal, Canada

<sup>4</sup> Division of Experimental Medicine, McGill University, Montreal, Canada

\*Corresponding author: [chris.moraes@mcgill.ca](mailto:chris.moraes@mcgill.ca)

## Supplemental Information

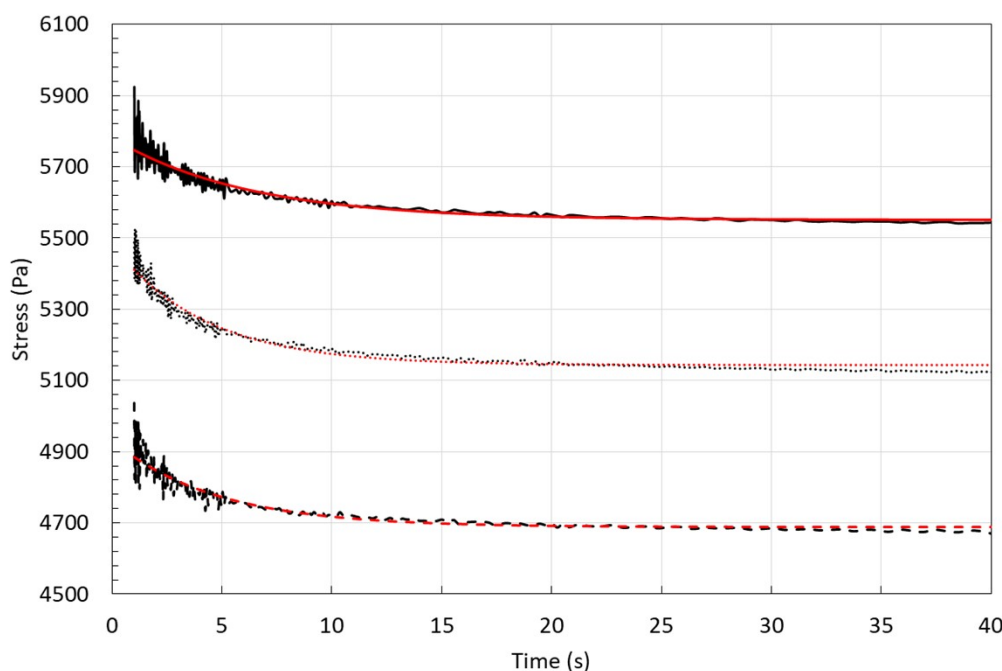

**Figure S1.** Characteristic stress relaxation curves for selected samples spanning our vPAA substrate formulations. Stress relaxation measurements were performed following the procedure previously used by Swoger et al.[1] by polymerizing a sample, placing it on the rheometer, and applying a constant shear strain of 5%, and measuring time-dependent shear stress. Stress relaxation times were obtained by

fitting the data to an arbitrary exponential function,  $\sigma(t) = A e^{\frac{-(t-B)}{\tau}} + C$ , where  $\tau$  is the characteristic stress relaxation time (black dots = collected data; red lines = fit). Stress relaxation time values (reported in Supplemental table S1) ranged from 6.19s (base formulation) to 4.19s (+3% linear PAA), which we anticipate to match with the expected frequency of cellular motion in native matrices [2].

**Supplemental Table S1.**

| vPAA formulation | Characteristic stress relaxation time $\tau$ (s) |
|------------------|--------------------------------------------------|
| Base             | 6.186                                            |
| +2% linear PAA   | 4.715                                            |
| +3% linear PAA   | 4.192                                            |

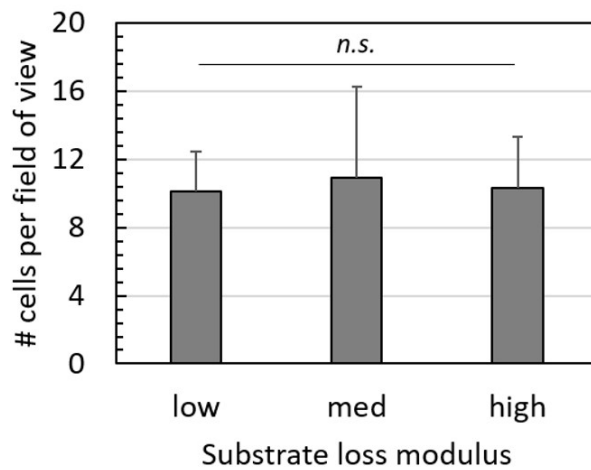

**Figure S2.** Number of cells per experimental viewfield across vPAA substrate formulations. Data confirms that no significant differences (n.s) were observed between substrates.

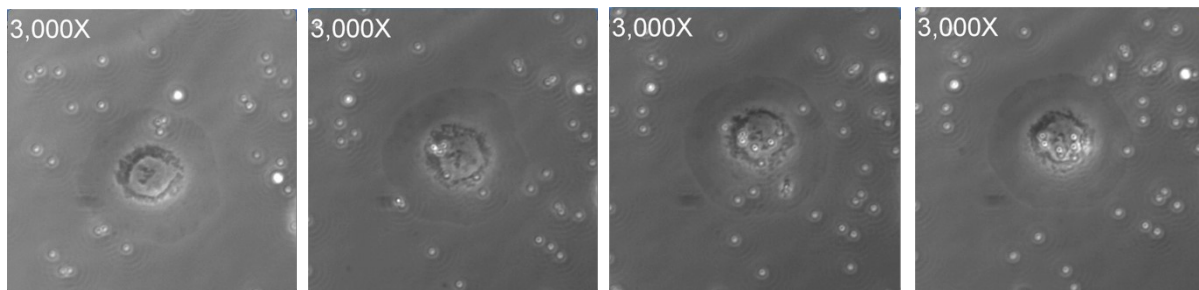

**Supplementary Movie S1.** Frames from a sample macrophage phagocytosis assay demonstrating that attached beads are each drawn towards the cell body during the phagocytosis process.



## Supplementary References

- [1] M. Swoger, S. Gupta, E.E. Charrier, M. Bates, H. Hehnly, A.E. Patteson, Vimentin Intermediate Filaments Mediate Cell Morphology on Viscoelastic Substrates, *ACS Appl. Bio Mater.* 5 (2022) 552–561. <https://doi.org/10.1021/acsabm.1c01046>.
- [2] C. Rivat, C. Sar, I. Mechaly, J.-P. Leyris, L. Diouloufet, C. Sonrier, Y. Philipson, O. Lucas, S. Mallié, A. Jouvenel, A. Tassou, H. Haton, S. Venteo, J.-P. Pin, E. Trinquet, F. Charrier-Savournin, A. Mezghrani, W. Joly, J. Mion, M. Schmitt, A. Pattyn, F. Marmigère, P. Sokoloff, P. Carroll, D. Rognan, J. Valmier, Inhibition of neuronal FLT3 receptor tyrosine kinase alleviates peripheral neuropathic pain in mice, *Nat. Commun.* 9 (2018) 1042. <https://doi.org/10.1038/s41467-018-03496-2>.
